# Supplementary material for: Metagenomic Annotation Networks: Construction and Applications
Source: PLoS One. 2012 Aug 7;7(8):e41283. doi: 10.1371/journal.pone.0041283 (PMC3413691; doi:10.1371/journal.pone.0041283)
Supplement: Table S2 — Functional annotations for clusters analyzed in this work. (XLS) [file pone.0041283.s002.xls]

## Sheet: Cellulase MetaCyc
Module	Score	Nodes	Edges	Members
1	14	14	91	Alanine biosynthesis I; Isoleucine biosynthesis I (from threonine); Isoleucine biosynthesis II; Isoleucine biosynthesis III; Isoleucine biosynthesis IV; Isoleucine biosynthesis V; Isoleucine degradation I; Isoleucine degradation II; Leucine biosynthesis; Leucine degradation I; Leucine degradation III; Valine biosynthesis; Valine degradation I; Valine degradation II
2	13.111	28	177	4-aminobutyrate degradation IV; 4-hydroxyphenylacetate degradation; 4-toluenecarboxylate degradation; 4-toluenesulfonate degradation I; Arginine biosynthesis II (acetyl cycle); Arginine biosynthesis III; Artemisinin biosynthesis; Bixin biosynthesis; Cuticular wax biosynthesis; Cutin biosynthesis; Enterobacterial common antigen biosynthesis; Glucosinolate biosynthesis from hexahomomethionine; Glut…
3	6	9	24	3-dehydroquinate biosynthesis I; Ascorbate biosynthesis I (L-galactose pathway); Chorismate biosynthesis I; D-mannose degradation; GDP-mannose biosynthesis; Mannitol biosynthesis; Mannitol degradation II; Pyridine nucleotide cycling (plants); Trans-zeatin biosynthesis

## Sheet: Cellulase COG
Module	Score	Nodes	Edges	Members
1	15	15	105	3-polyprenyl-4-hydroxybenzoate decarboxylase; 3-polyprenyl-4-hydroxybenzoate decarboxylase and related decarboxylases; ABC-type cobalt transport system, permease component CbiQ and related transporters; ABC-type uncharacterized transport system, permease component; ABC-type uncharacterized transport systems, ATPase components; ATPase components of various ABC-type transport systems, contain dupli…
2	10.6	11	53	Beta-xylosidase; DNA-directed RNA polymerase specialized sigma subunit, sigma24 homolog; Fucose 4-O-acetylase and related acetyltransferases; Glycosyltransferase; Glycosyltransferases, probably involved in cell wall biogenesis; Mannose-1-phosphate guanylyltransferase; Periplasmic protein involved in polysaccharide export; Predicted glycosyltransferases; Sugar transferases involved in lipopolysacc…
3	9	9	36	4-hydroxyphenylpyruvate dioxygenase and related hemolysins; Fe2+/Zn2+ uptake regulation proteins; Ferredoxin; Pyruvate:ferredoxin oxidoreductase and related 2-oxoacid:ferredoxin oxidoreductases, alpha subunit; Pyruvate:ferredoxin oxidoreductase and related 2-oxoacid:ferredoxin oxidoreductases, beta subunit; Pyruvate:ferredoxin oxidoreductase and related 2-oxoacid:ferredoxin oxidoreductases, gamma…

## Sheet: Gut KEGG
Module	Score	Nodes	Edges	Members
1	6.167	13	37	Bacitracin transport system; C5 isoprenoid biosynthesis, mevalonate pathway; Ceramide biosynthesis; Eicosanoid biosynthesis, arachidonate => 8(S)-HETE; Gluconeogenesis, oxaloacetate => fructose-6P; Glycolysis (Embden-Meyerhof pathway), glucose => pyruvate; Glycolysis, core module involving three-carbon compounds; Indolepyruvate:ferredoxin oxidoreductase; Non-phosphorylative Entner-Doudoroff pathw…
2	5.333	7	16	C5 isoprenoid biosynthesis, mevalonate pathway; Capsular polysaccharide transport system; GABA (gamma-Aminobutyrate) shunt; Lysine biosynthesis, 2-oxoglutarate => 2-aminoadipate => lysine; Melatonin biosynthesis, tryptophan => serotonin => melatonin; Ornithine biosynthesis, glutamate => ornithine; Urea cycle
3	5	5	10	Cholecalciferol biosynthesis; Phenylalanine biosynthesis, chorismate => phenylalanine; Tryptophan biosynthesis, chorismate => tryptophan; Tyrosine biosynthesis, chorismate => tyrosine; Uridine monophosphate biosynthesis, glutamine (+ PRPP) => UMP

## Sheet: Gut TIGRFAM
Module	Score	Nodes	Edges	Members
1	8.235	18	70	30S ribosomal protein S17; 50S ribosomal protein L3, bacterial; 50S ribosomal protein L4, bacterial/organelle; Preprotein translocase, SecY subunit; Ribosomal protein L14, bacterial/organelle; Ribosomal protein L15, bacterial/organelle; Ribosomal protein L16, bacterial/organelle; Ribosomal protein L18, bacterial type; Ribosomal protein L2, bacterial/organellar; Ribosomal protein L22, bacterial ty…
2	8	8	28	50S ribosomal protein L14P; 50S ribosomal protein L30P, archaeal; Archaeal ribosomal protein S17P; Ribosomal protein L24p/L26e, archaeal/eukaryotic; Ribosomal protein L29; Ribosomal protein S3, eukaryotic/archaeal type; Ribosomal protein S5(archaeal type)/S2(eukaryote cytosolic type); Translation initation factor SUI1, putative, prokaryotic
3	7	7	21	Methyl-coenzyme M reductase I operon protein C; Methyl-coenzyme M reductase operon protein D; Methyl-coenzyme M reductase, alpha subunit; Methyl-coenzyme M reductase, beta subunit; Methyl-coenzyme M reductase, gamma subunit; Tetrahydromethanopterin S-methyltransferase, subunit C; Tetrahydromethanopterin S-methyltransferase, subunit D

## Sheet: Gut Intersect
Module	Score	Nodes	Edges	Members
1	8.167	13	49	30S ribosomal protein S17; 50S ribosomal protein L3, bacterial; 50S ribosomal protein L4, bacterial/organelle; Ribosomal protein L14, bacterial/organelle; Ribosomal protein L16, bacterial/organelle; Ribosomal protein L18, bacterial type; Ribosomal protein L2, bacterial/organellar; Ribosomal protein L22, bacterial type; Ribosomal protein L24, bacterial/organelle; Ribosomal protein L29; Ribosomal p…
2	4	4	6	Preprotein translocase, SecY subunit; Ribosomal protein L15, bacterial/organelle; Ribosomal protein L30, bacterial/organelle; Ribosomal protein S5, bacterial/organelle type
3	4	4	6	30S ribosomal protein S11; DNA-directed RNA polymerase, alpha subunit, bacterial and chloroplast-type; Ribosomal protein L17; Ribosomal protein S4, bacterial/organelle type

## Sheet: Gut Diff
Module	Score	Nodes	Edges	Members
1	7.714	8	27	50S ribosomal protein L14P; 50S ribosomal protein L30P, archaeal; Archaeal ribosomal protein S17P; Ribosomal protein L24p/L26e, archaeal/eukaryotic; Ribosomal protein L29; Ribosomal protein S3, eukaryotic/archaeal type; Ribosomal protein S5(archaeal type)/S2(eukaryote cytosolic type); Translation initation factor SUI1, putative, prokaryotic
2	6.667	7	20	Methyl-coenzyme M reductase I operon protein C; Methyl-coenzyme M reductase operon protein D; Methyl-coenzyme M reductase, alpha subunit; Methyl-coenzyme M reductase, beta subunit; Methyl-coenzyme M reductase, gamma subunit; Tetrahydromethanopterin S-methyltransferase, subunit C; Tetrahydromethanopterin S-methyltransferase, subunit D
3	4	4	6	50S ribosomal protein L4P; Archaeal ribosomal protein L23; Archaeal ribosomal protein L3; Ribosomal protein L22(archaeal)/L17(eukaryotic/archaeal)
